# Supplementary material
Source: Springer Nature journal article supplement (http://www.springermedizin.de/resource/supplementary/12888_2009_718_MOESM1_ESM.pdf/9478276)
Supplement: MOESM1 [file 9478276]

**Black: n=375**  
**White: n=605**

**All Patients**

**Black: n=184 (49%)**  
**White: n=333 (55%)**

**Completers**

**Black: n=191 (51%)**  
**White: n=272 (45%)**

**Discontinued by week 24 or 28**  $p=.133$

**Poor Response & Psychiatric Worsening**  
**Black: n=37 (19%)**  
**White: n=98 (36%)**

$p=.0007$

**Poor Response**  
**Black: n=20 (10%)**  
**White: n=48 (18%)**

$p=.206$

**Psychiatric Worsening**  
**Black: n=17 (9%)**  
**White: n=50 (18%)**

$p=.002$

**Medication Intolerability**  
**Black: n=26 (14%)**  
**White: n=28 (10%)**

$p=.320$

**Other**  
**Black: n=128 (67%)**  
**White: n=146 (54%)**

$p=.014$
